# Supplementary material for: Photochemical carbon–sulfur bond cleavage in thioethers mediated via excited state Rydberg-to-valence evolution
Source: Royal Society of Chemistry journal article supplement (doi:10.1039/d2cp04789f), 2022-01-01
Supplement: d2cp04789f1.pdf [file d2cp04789f1.pdf]

## Photochemical carbon-sulfur bond cleavage in thioethers mediated via excited state Rydberg-to-valence evolution

Nikoleta Kotsina, Sebastian L. Jackson, Thomas Malcomson, Martin J. Paterson and  
Dave Townsend

### *Electronic Supplementary Information*

Absorption spectra plus additional quantum chemistry calculations, TRPEI data and analysis.

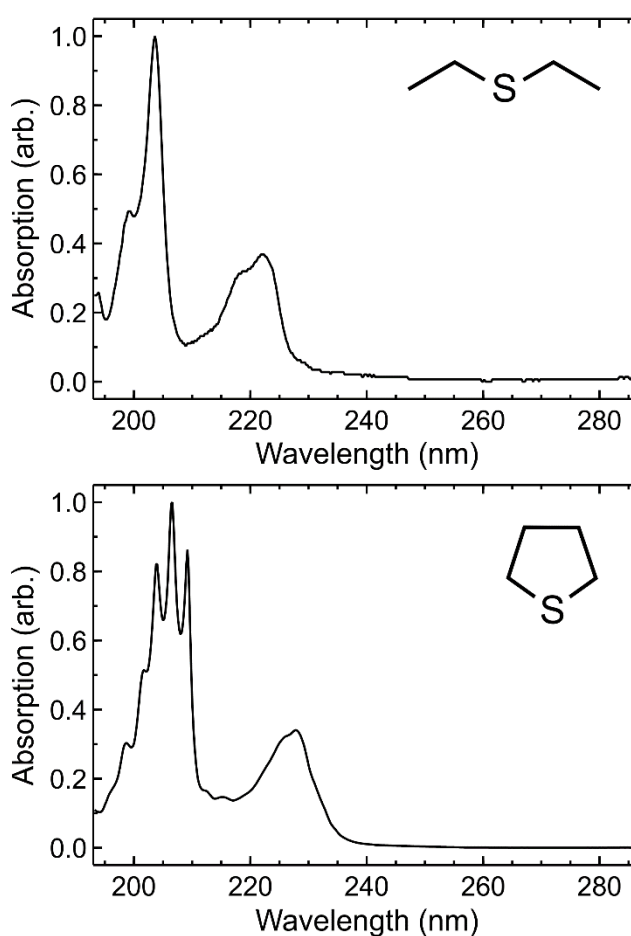

**Figure S1:** Vapour-phase UV absorption spectra of DES and THT recorded using a commercial benchtop spectrophotometer (Shimadzu UV-2550).

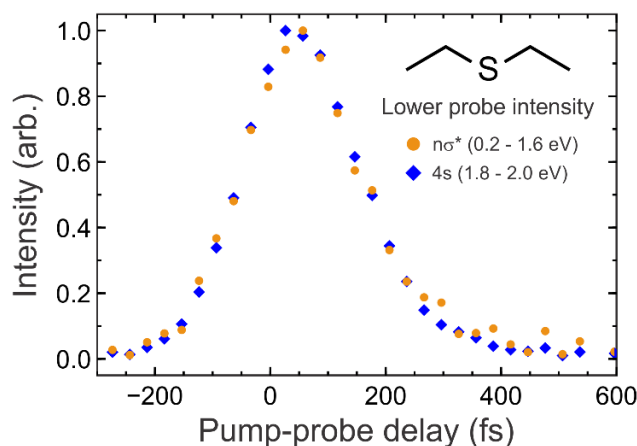

**Figure S2:** Normalized data points show 200/267 nm pump/probe transient photoelectron signals integrated over energy regions corresponding to 4s and  $n\sigma^*$ -type ionization in DES under lower probe intensity conditions. No significant differences in timescale are seen, indicating that any extremely rapid transitory Rydberg-to-valence dynamics are not resolvable given our experimental cross-correlation of  $200 \pm 10$  fs FWHM.

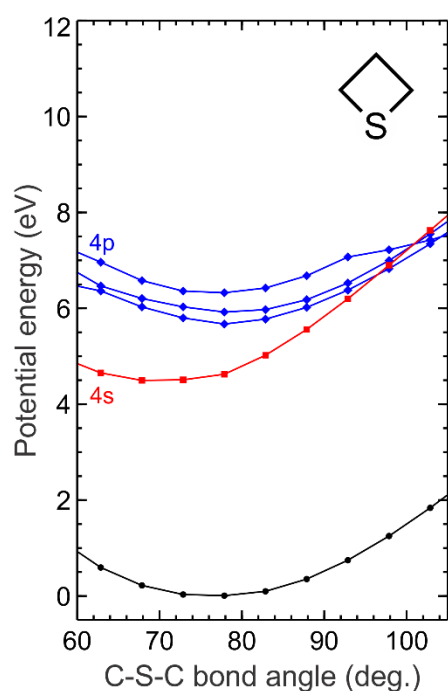

**Figure S3:** EOM-CCSD potential energy cuts for the  $S_0$ , 4s and 4p states of THI along C-S-C bending coordinate. The point of electronic degeneracy between the 4s state and 4p manifold ( $\sim 15^\circ$  from the  $S_0$  minimum) is slightly more displaced here than for DES and THT ( $\sim 6^\circ$ ) but does not appear to significantly reduce internal conversion rates following 200 nm excitation.

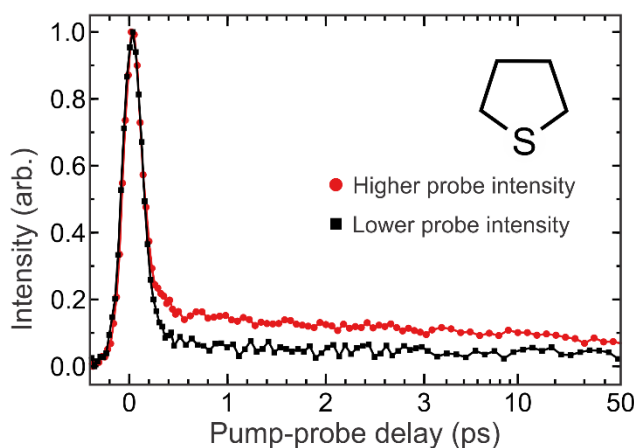

**Figure S4:** Transient signals from THT under both lower and higher intensity probe conditions when integrating TRPEI signals over all photoelectron kinetic energies following 200/267 nm pump/probe measurements. The enhancement of the long-lived signal extending to 50 ps is clearly seen in the higher probe intensity regime. See Figs. 4 and 7 in the main text for the corresponding energy resolved data.

|                                                                                                       | $n\sigma^*$                                                         | Radical intermediate                                                | 4s                                                                | 4p                                                                 |
|-------------------------------------------------------------------------------------------------------|---------------------------------------------------------------------|---------------------------------------------------------------------|-------------------------------------------------------------------|--------------------------------------------------------------------|
| <br>(Higher power) | $\beta_2 = 0.30(1)$<br>$\beta_4 = 0.03(1)$<br>$\beta_6 = 0.01(1)$   | $\beta_2 = 0.90(4)$<br>$\beta_4 = 0.19(2)$<br>$\beta_6 = 0.03(3)$   | $\beta_2 = 1.34(4)$<br>$\beta_4 = 0.28(4)$<br>$\beta_6 = 0.18(3)$ | $\beta_2 = 1.58(4)$<br>$\beta_4 = 0.44(3)$<br>$\beta_6 = 0.10(4)$  |
| <br>(Lower power)  | $\beta_2 = 0.33(2)$<br>$\beta_4 = -0.01(2)$                         | -                                                                   | $\beta_2 = 0.94(6)$<br>$\beta_4 = 0.09(6)$                        | $\beta_2 = 0.87(3)$<br>$\beta_4 = 0.18(4)$                         |
| <br>(Higher power) | $\beta_2 = 0.10(1)$<br>$\beta_4 = -0.09(1)$<br>$\beta_6 = 0.00(2)$  | $\beta_2 = 0.57(2)$<br>$\beta_4 = -0.04(3)$<br>$\beta_6 = -0.02(3)$ | $\beta_2 = 0.94(2)$<br>$\beta_4 = 0.10(3)$<br>$\beta_6 = 0.02(3)$ | $\beta_2 = 0.87(1)$<br>$\beta_4 = 0.17(1)$<br>$\beta_6 = 0.06(2)$  |
| <br>(Lower power)  | $\beta_2 = 0.18(3)$<br>$\beta_4 = -0.20(4)$                         | -                                                                   | $\beta_2 = 1.22(8)$<br>$\beta_4 = 0.25(7)$                        | $\beta_2 = 1.31(6)$<br>$\beta_4 = 0.34(6)$                         |
| <br>(Higher power) | $\beta_2 = 0.22(2)$<br>$\beta_4 = -0.03(2)$<br>$\beta_6 = -0.02(3)$ | $\beta_2 = 0.59(2)$<br>$\beta_4 = -0.01(2)$<br>$\beta_6 = 0.00(3)$  | $\beta_2 = 1.32(2)$<br>$\beta_4 = 0.29(3)$<br>$\beta_6 = 0.01(4)$ | $\beta_2 = 1.31(2)$<br>$\beta_4 = 0.27(3)$<br>$\beta_6 = -0.01(3)$ |

**Table S1:** Photoelectron anisotropy parameters obtained for all systems and probe power regimes investigated in this study. Values were obtained from fits to the image data using a time- and energy-integrated form of Eq. 1 given (and discussed) in the main article text. Values in parentheses denote  $1\sigma$  uncertainties in the final significant figure. Energy integration windows vary slightly between systems but span the individual spectral features assigned to ionization from states exhibiting predominantly 4p, 4s and  $n\sigma^*$  character, as well as (for the higher probe intensity scenario) an electronically excited radical fragment (DES) or biradical ring-opened intermediate (THT and THI). See Fig. 7 in the main article text for guidance.
